# Supplementary material for: Climate change effect on wheat phenology depends on cultivar change
Source: Springer Nature journal article supplement (doi:10.1038/s41598-018-23101-2), 2018-03-14
Supplement: MOESM1 [file 41598_2018_23101_MOESM1_ESM.pdf]

1 **Supplementary Information**

2 **Climate change effect on wheat phenology depends on cultivar change**

3  
4 Ehsan Eyshi Rezaei<sup>1,2,4\*</sup>, Stefan Siebert<sup>1,4</sup>, Hubert Hüging<sup>1</sup> and Frank Ewert<sup>1,3</sup>

5  
6 <sup>1</sup> Institute of Crop Science and Resource Conservation, University of Bonn, Katzenburgweg 5,  
7 D-53115 Bonn, Germany

8 <sup>2</sup> Center for Development Research (ZEF), Walter-Flex-Straße 3, 53113 Bonn, Germany

9 <sup>3</sup> Leibniz Centre for Agricultural Landscape Research, Institute of Landscape Systems Analysis,  
10 D-15374 Müncheberg, Germany

11 <sup>4</sup> Department of Crop Sciences, University of Göttingen, Von-Siebold-Strasse 8, 37075  
12 Göttingen, Germany

13  
14  
15  
16  
17  
18  
19  
20  
21  
22  
23  
24  
25  
26  
27  
28 \*Corresponding author

29 [ehsan.eyshi-rezaei@uni-goettingen.de](mailto:ehsan.eyshi-rezaei@uni-goettingen.de)

30 Phone: +49(0) 551-39-24676

31

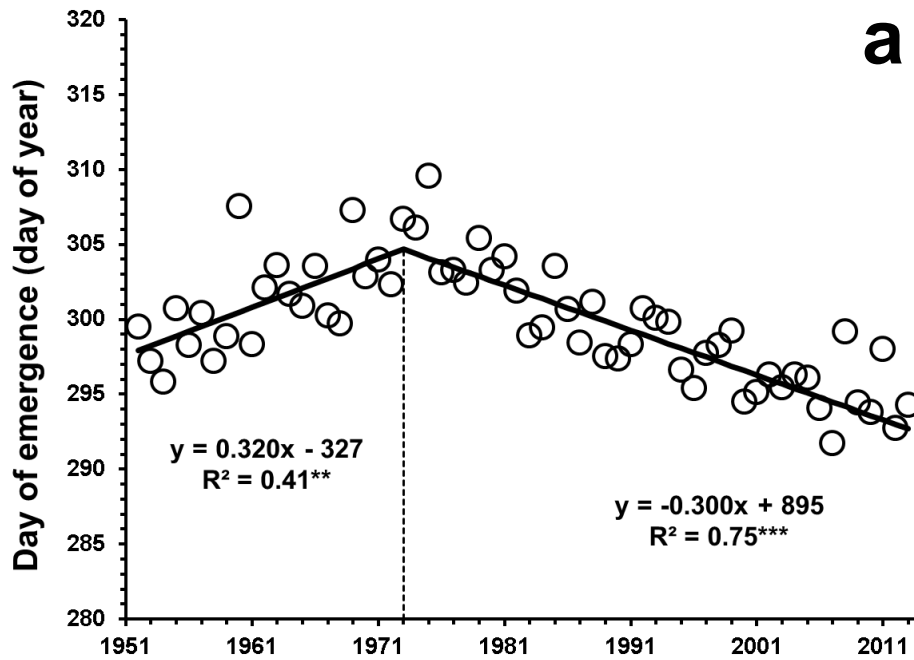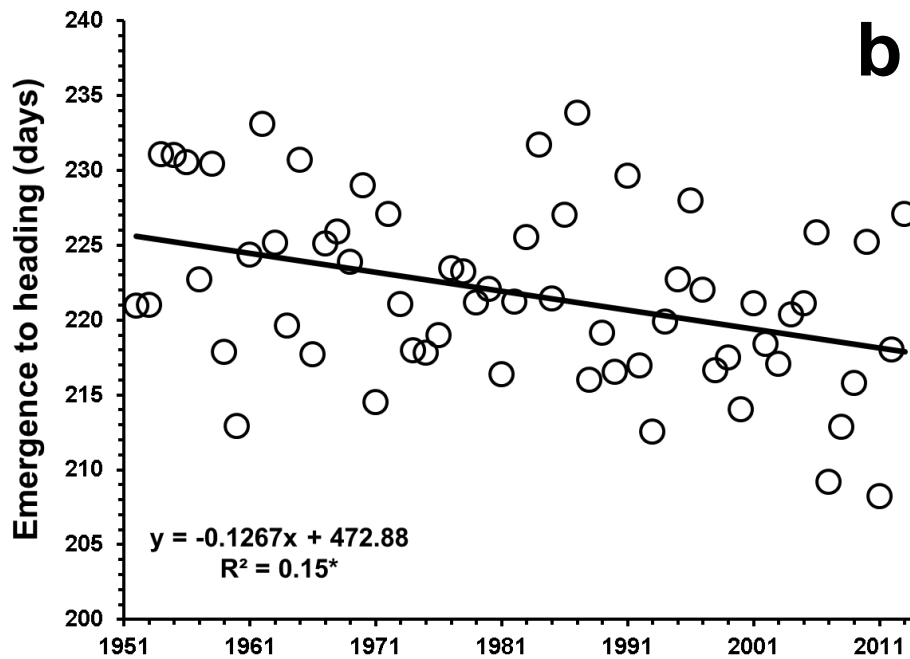

1  
2  
3  
4  
5  
6  
7  
8  
9  
10  
11  
12  
13  
14  
15  
16  
17  
18  
19  
20  
21  
22  
23  
24  
25  
26  
27  
28  
29

Supplementary Figure 1. Long-term trends in day of emergence (a) and length of vegetative phase (emergence-heading) (b) in the period 1952-2013 at 1 km × 1 km resolution across western Germany.

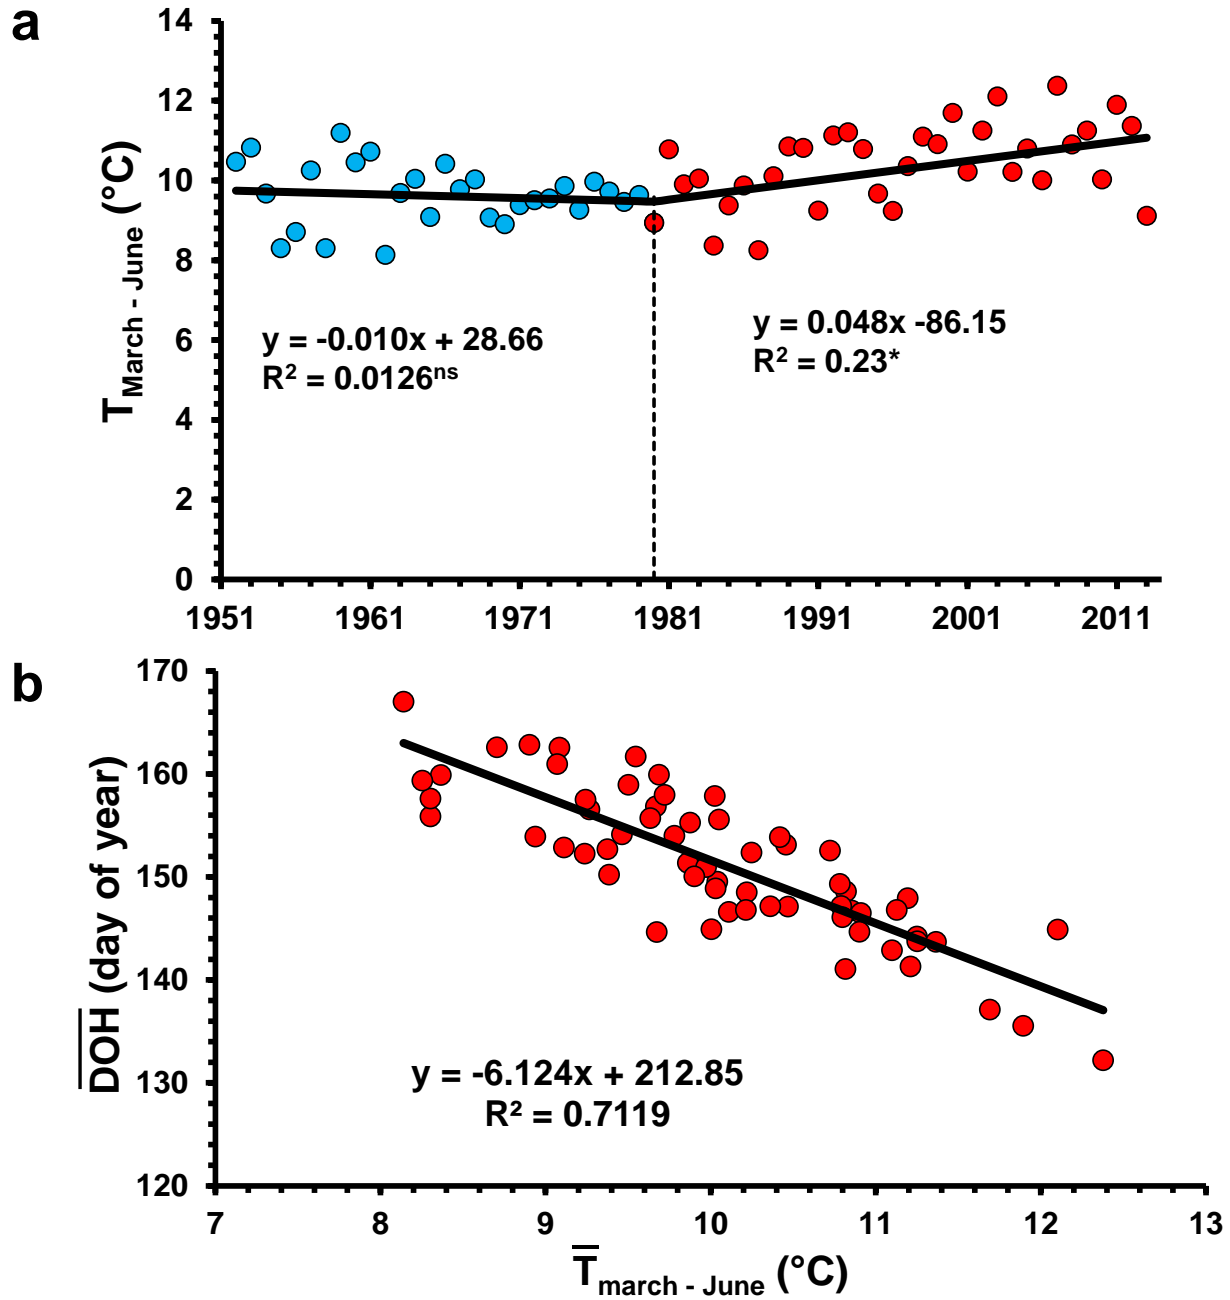

1  
 2 Supplementary Figure 2. The trends in mean temperature (March-June) in the period 1952-2013  
 3 across western Germany (a) and the relationship between observed mean heading day and mean  
 4 temperature (b).

5  
 6  
 7

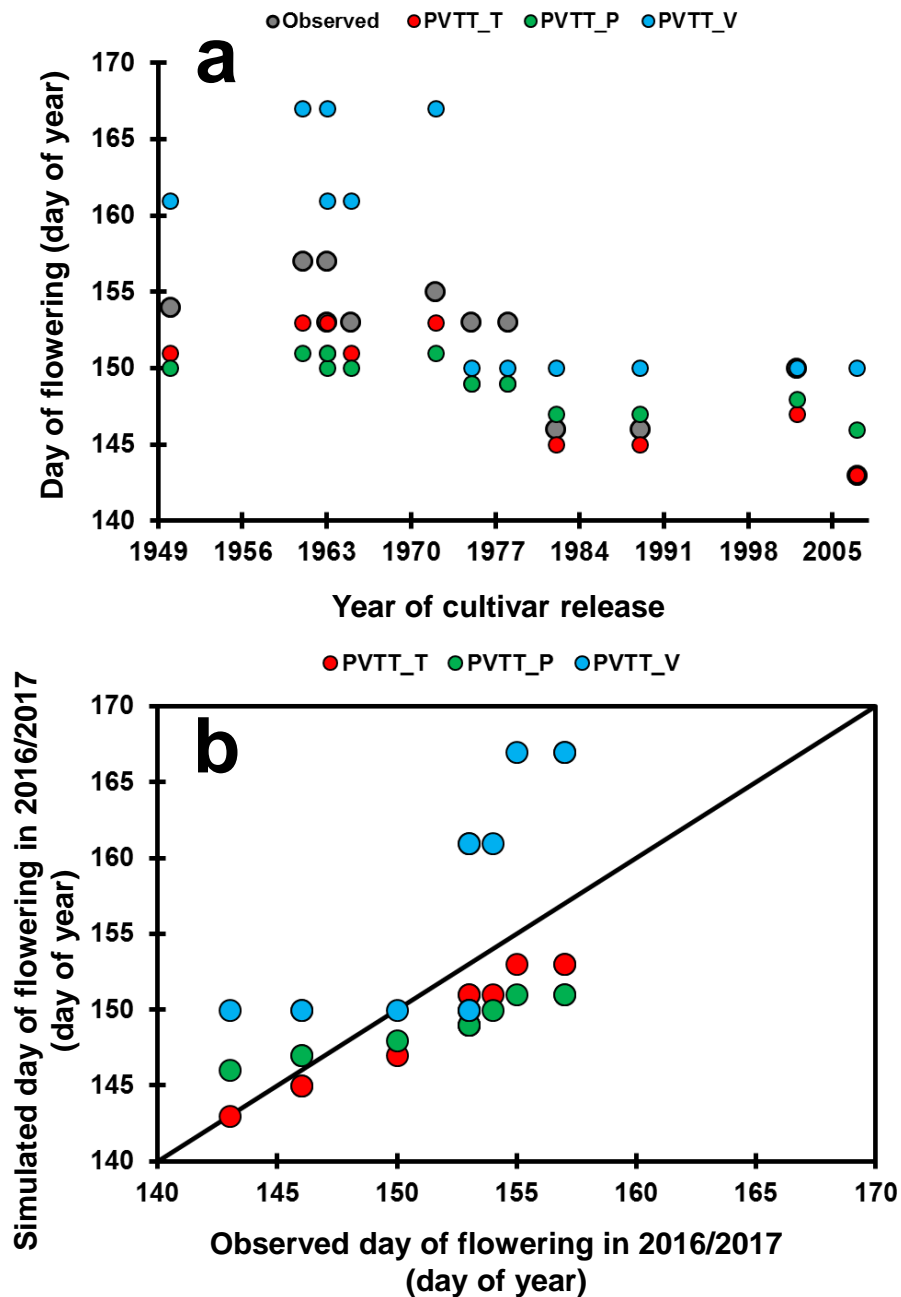

1  
 2 Supplementary Figure 3. Comparison of the observed flowering day in the 2016/2017 growing  
 3 season to flowering day simulated for the same season with different parameters obtained using  
 4 the observations for the 2015/2016 growing season to adjust the phenology model parameters.  
 5 Phenology parameter sets included fix photoperiod and vernalization but cultivar specific  
 6 thermal requirement (PVTT\_T), fix vernalization and thermal requirement but cultivar specific  
 7 photoperiod (PVTT\_P) and fix photoperiod and thermal requirement but cultivar specific

1 vernalization requirement (PVTT\_V) for 12 cultivars representative for distinct historical time  
2 periods in the field experiment at Dikopshof, Germany (a). The 1:1 plot of the flowering day  
3 simulated for season 2016/2017 with PVTT\_T, PVTT\_P and PVTT\_V parameter sets obtained  
4 by using the observations made for season 2015/2016 against flowering day observed for season  
5 2016/2017 (b).

6  
7  
8  
9  
10  
11  
12  
13  
14  
15  
16  
17  
18  
19  
20  
21  
22  
23  
24  
25  
26  
27  
28  
29  
30  
31

New cultivar (Tommi)

Old cultivar (HeinesVII)

23 May 2016

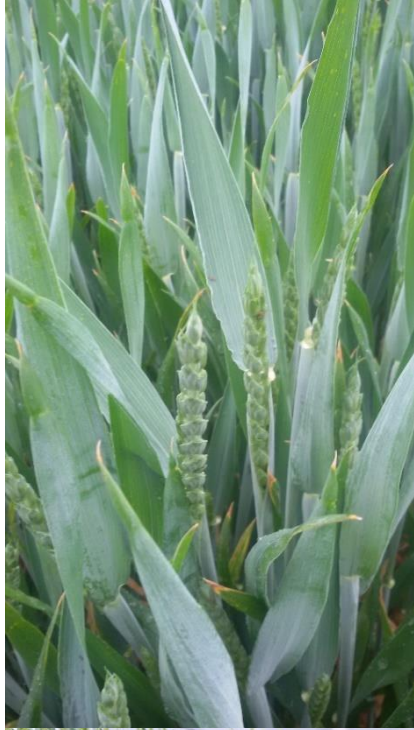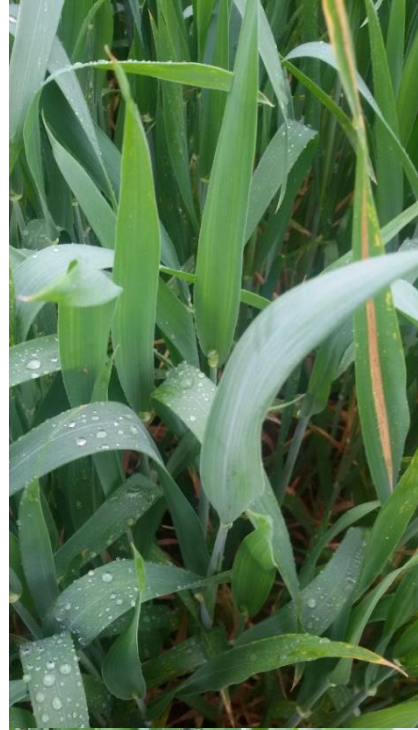

31 May 2016

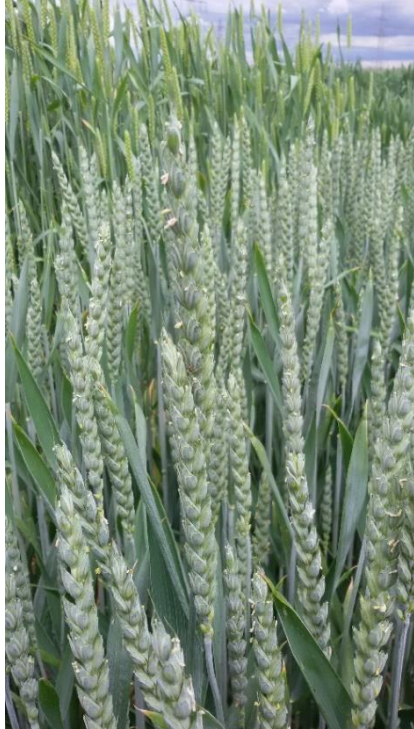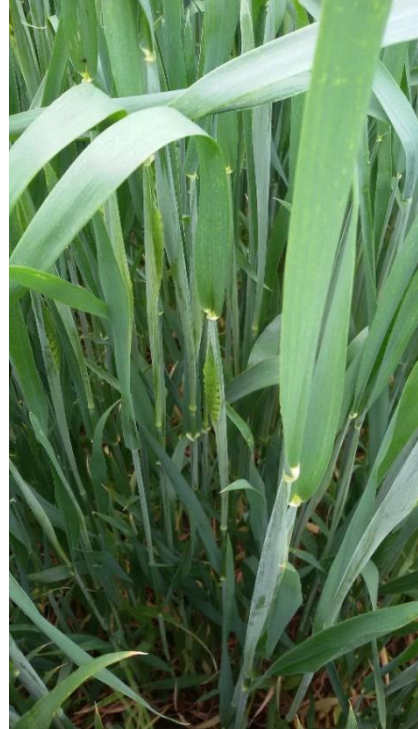

1

2 Supplementary Figure 4. The development stages of a new and an old cultivars at two dates in  
3 the field experiment.

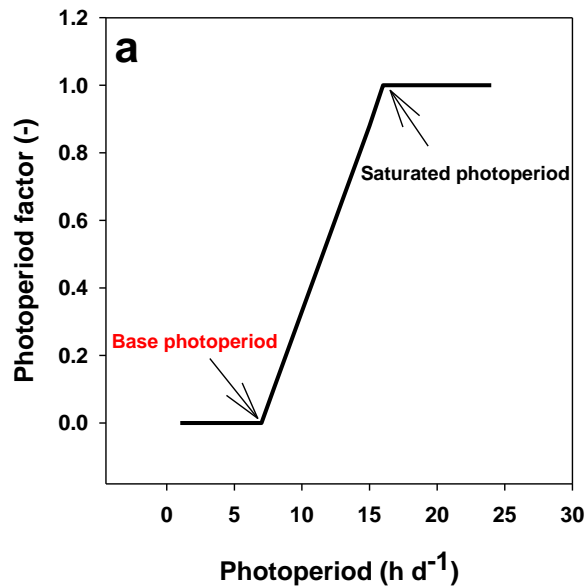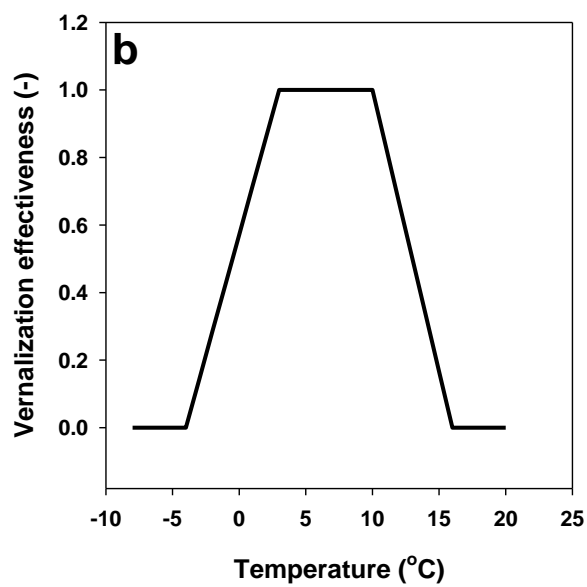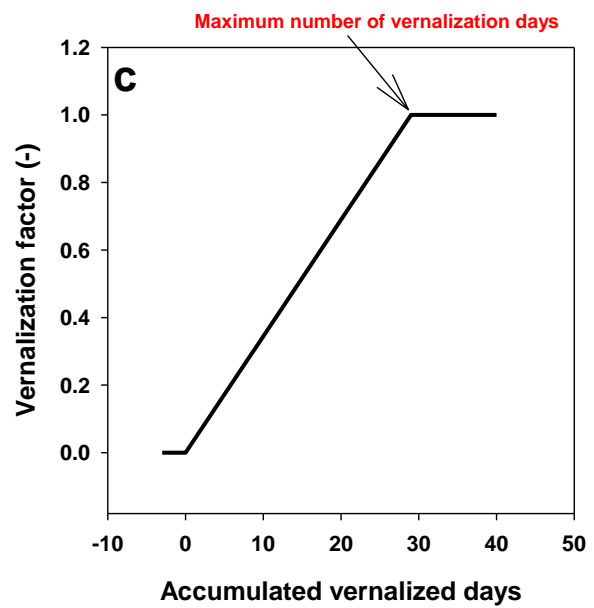

1  
 2 Supplementary Figure 5. Parameter values for effect of photoperiod (a) and vernalization (b and  
 3 c) on phenological development of winter wheat in the SIMPLACE modeling platform. The  
 4 parameters highlighted in red are the one that we change at the sensitivity analysis.

5  
 6  
 7  
 8  
 9

1 Supplementary Table 1. List of representative cultivars cultivated in the field experiment at  
 2 Dikopshof, Germany, during the 2015/2016 and 2016/2017 growing seasons reporting year of  
 3 release, observed flowering day and a link to the genetic resources information available in the  
 4 Genetic Resources Information System for Wheat and Triticale (GRIS).

| Cultivar                    | Year of release* | Flowering in 2016 (day of year) | Flowering in 2017 (day of year) | Web link to GIRS                                          |
|-----------------------------|------------------|---------------------------------|---------------------------------|-----------------------------------------------------------|
| Heines VII                  | 1950             | 155                             | 154                             | <a href="https://goo.gl/qBTpcg">https://goo.gl/qBTpcg</a> |
| Jubilar                     | 1961             | 157                             | 157                             | <a href="https://goo.gl/6PihcZ">https://goo.gl/6PihcZ</a> |
| Anda                        | 1963             | 157                             | 153                             | <a href="https://goo.gl/rFZfjk">https://goo.gl/rFZfjk</a> |
| Hanno                       | 1963             | 155                             | 157                             | <a href="https://goo.gl/1M48DA">https://goo.gl/1M48DA</a> |
| HS Burgweizen               | 1965             | 155                             | 153                             | <a href="https://goo.gl/BBzaFN">https://goo.gl/BBzaFN</a> |
| Poppelsdorfer<br>Begrannter | 1972             | 157                             | 155                             | <a href="https://goo.gl/7X1hDF">https://goo.gl/7X1hDF</a> |
| Carimulti                   | 1975             | 152                             | 153                             | <a href="https://goo.gl/AEBKFY">https://goo.gl/AEBKFY</a> |
| Okapi                       | 1978             | 152                             | 153                             | <a href="https://goo.gl/5RLEw2">https://goo.gl/5RLEw2</a> |
| Sperber                     | 1982             | 148                             | 146                             | <a href="https://goo.gl/7a8DGB">https://goo.gl/7a8DGB</a> |
| Greif                       | 1989             | 148                             | 146                             | <a href="https://goo.gl/2cYAti">https://goo.gl/2cYAti</a> |
| Tommi                       | 2002             | 150                             | 150                             | <a href="https://goo.gl/xgcyzF">https://goo.gl/xgcyzF</a> |
| Premio                      | 2007             | 146                             | 143                             | <a href="https://goo.gl/kkmnBK">https://goo.gl/kkmnBK</a> |

5 \*Obtained from <http://www.wheatpedigree.net/>

6  
7  
8  
9  
10  
11  
12  
13  
14  
15  
16



1 Supplementary Table 2. List of the parameters for photo vernal thermal time (PVTT), base  
 2 photoperiod (P<sub>b</sub>) and vernalization days (V<sub>days</sub>) used in the sensitivity analysis for the  
 3 parameter sets with fix photoperiod and vernalization but cultivar specific thermal requirement  
 4 (PVTT\_T), fix vernalization and thermal requirement but cultivar specific photoperiod  
 5 (PVTT\_P) and fix photoperiod and thermal requirement but cultivar specific vernalization  
 6 requirement (PVTT\_V) for 12 cultivars representative for distinct historical time periods used in  
 7 the field experiment at Dikopshof, Germany.

| Cultivar/year of release      | Parameter         | Parametrization procedure |        |        |
|-------------------------------|-------------------|---------------------------|--------|--------|
|                               |                   | PVTT_T                    | PVTT_P | PVTT_V |
| Heines VII/1950               | PVTT              | 681                       | 660    | 660    |
|                               | P <sub>b</sub>    | 7                         | 7.2    | 7      |
|                               | V <sub>days</sub> | 30                        | 30     | 190    |
| Jubilar/1961                  | PVTT              | 711                       | 660    | 660    |
|                               | P <sub>b</sub>    | 7                         | 7.6    | 7      |
|                               | V <sub>days</sub> | 30                        | 30     | 210    |
| Anda/1963                     | PVTT              | 681                       | 660    | 660    |
|                               | P <sub>b</sub>    | 7                         | 7.2    | 7      |
|                               | V <sub>days</sub> | 30                        | 30     | 190    |
| Hanno/1963                    | PVTT              | 711                       | 660    | 660    |
|                               | P <sub>b</sub>    | 7                         | 7.6    | 7      |
|                               | V <sub>days</sub> | 30                        | 30     | 210    |
| HS Burgweizen/1965            | PVTT              | 681                       | 660    | 660    |
|                               | P <sub>b</sub>    | 7                         | 7.2    | 7      |
|                               | V <sub>days</sub> | 30                        | 30     | 190    |
| Poppelsdorfer Begrannter/1972 | PVTT              | 711                       | 660    | 660    |
|                               | P <sub>b</sub>    | 7                         | 7.6    | 7      |
|                               | V <sub>days</sub> | 30                        | 30     | 210    |
| Carimulti/1975                | PVTT              | 638                       | 660    | 660    |
|                               | P <sub>b</sub>    | 7                         | 6.6    | 7      |
|                               | V <sub>days</sub> | 30                        | 30     | 1      |
| Okapi/1978                    | PVTT              | 638                       | 660    | 660    |
|                               | P <sub>b</sub>    | 7                         | 6.6    | 7      |
|                               | V <sub>days</sub> | 30                        | 30     | 1      |
| Sperber/1982                  | PVTT              | 577                       | 660    | 660    |
|                               | P <sub>b</sub>    | 7                         | 5.5    | 7      |
|                               | V <sub>days</sub> | 30                        | 30     | 1      |
| Greif/1989                    | PVTT              | 577                       | 660    | 660    |
|                               | P <sub>b</sub>    | 7                         | 5.5    | 7      |
|                               | V <sub>days</sub> | 30                        | 30     | 1      |
| Tommi/2002                    | PVTT              | 607                       | 660    | 660    |
|                               | P <sub>b</sub>    | 7                         | 6.0    | 7      |
|                               | V <sub>days</sub> | 30                        | 30     | 1      |

|             |                   |     |     |     |
|-------------|-------------------|-----|-----|-----|
| Premio/2007 | PVTT              | 554 | 660 | 660 |
|             | P <sub>b</sub>    | 7   | 4.9 | 7   |
|             | V <sub>days</sub> | 30  | 30  | 1   |

- 
- 1 PVTT: photo vernal thermal time (°C day), P<sub>b</sub>: base photoperiod (h), V<sub>days</sub>: maximum number  
2 of vernalization days (d)
